# Supplementary material for: Association of rs9679162 Genetic Polymorphism and Aberrant Expression of Polypeptide N-Acetylgalactosaminyltransferase 14 (GALNT14) in Head and Neck Cancer
Source: MDPI journal article supplement (doi:10.3390/cancers14174217), 2022-08-30
Supplement: s1 [file s1]

Supplementary Figures

Supplementary Figure S1.

Figure 4g. GALNT14 protein expression in 7 OSCC cell lines.

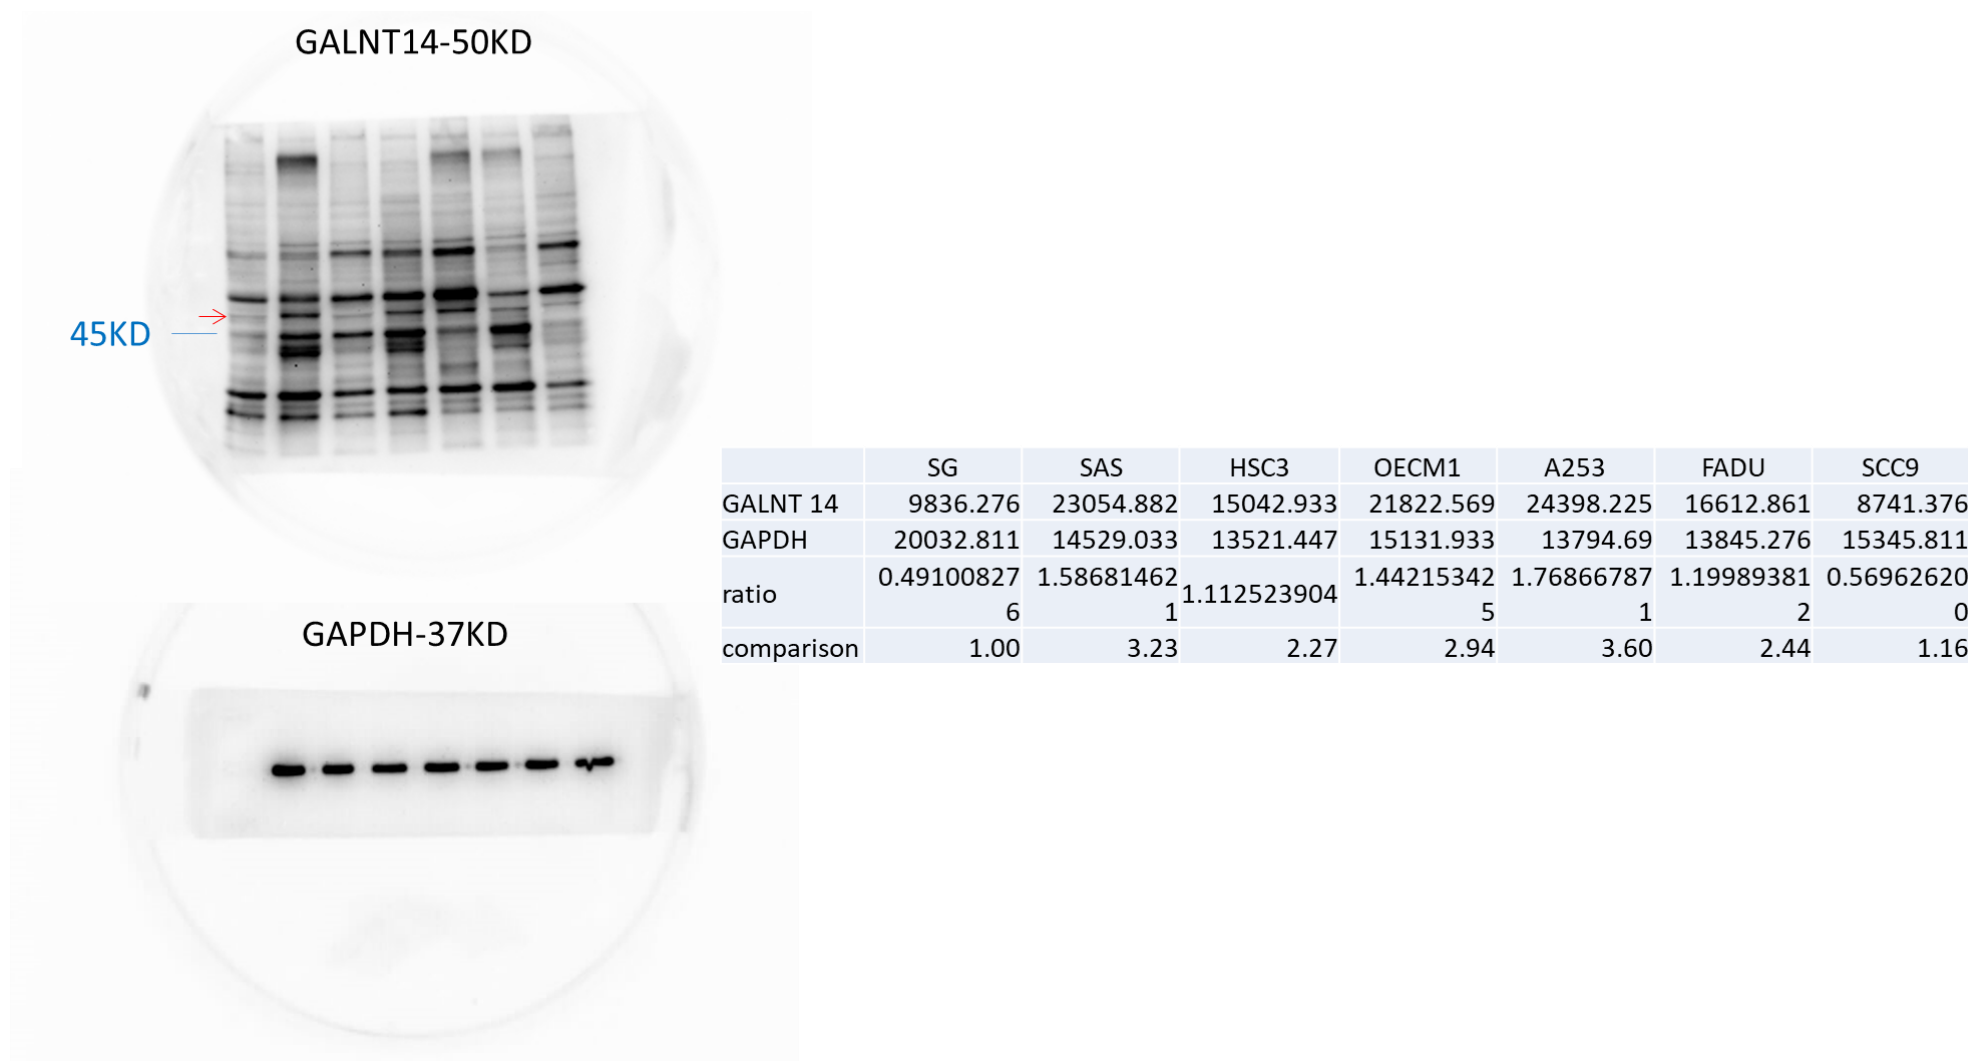

Figure 4h. GALNT14 protein expression after treatment with vehicle, 12.5 or 100 µg/mL arecoline for 24 h in SG.

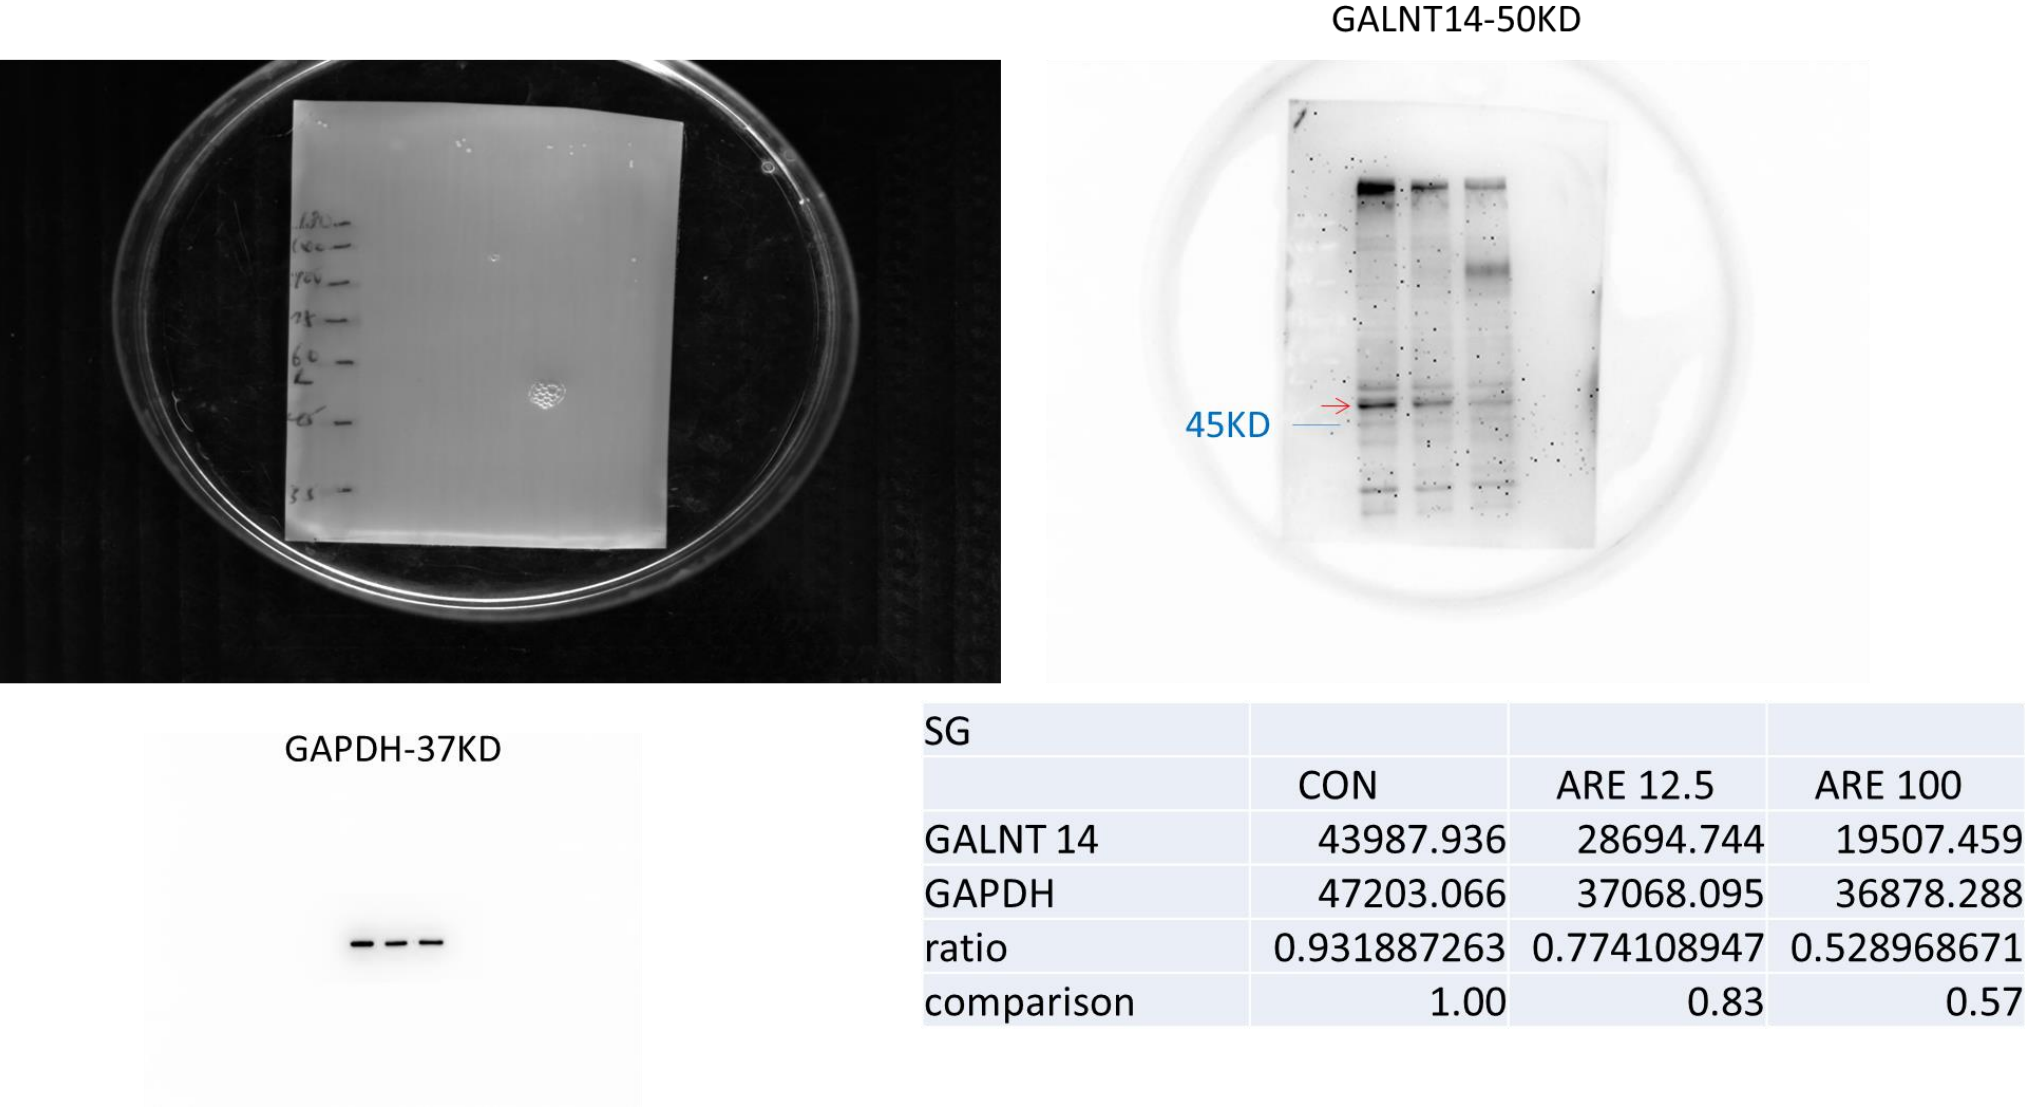

Figure 4i. GALNT14 protein expression after treatment with vehicle, 12.5 or 100 µg/mL arecoline for 24 h in SAS.

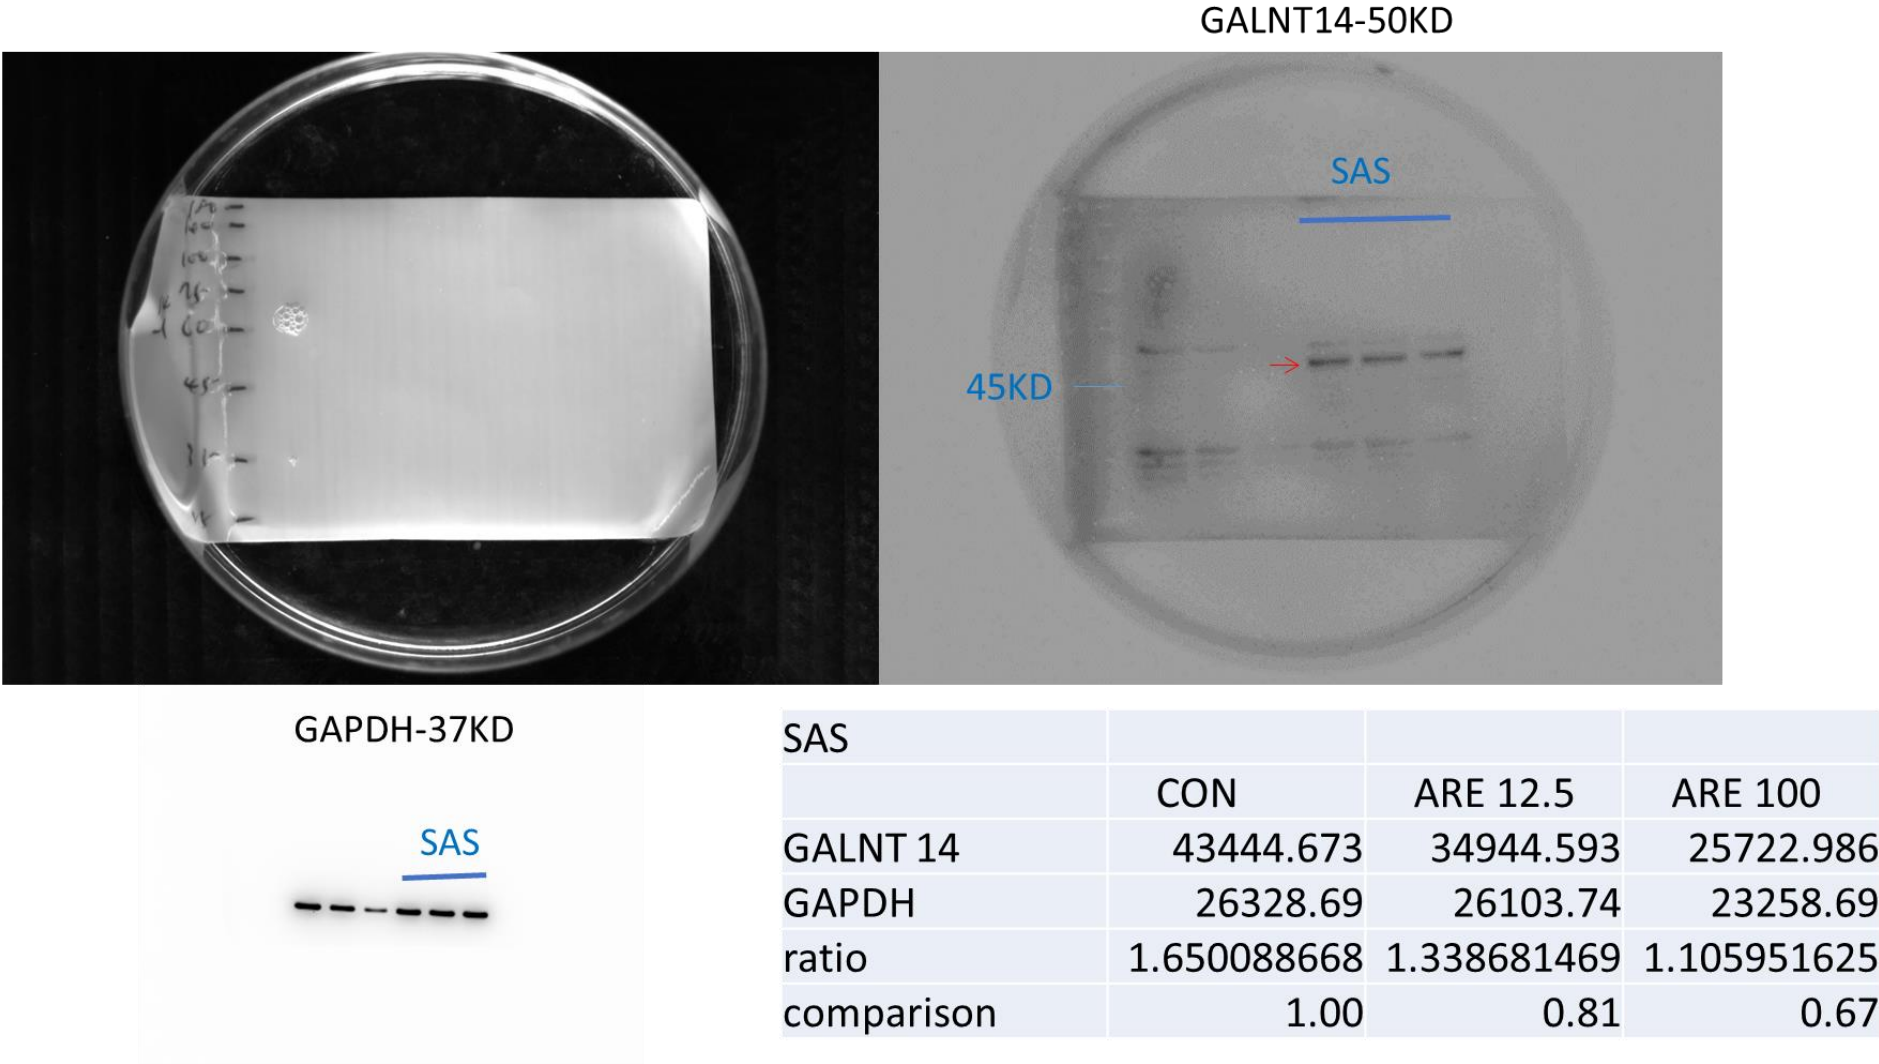

Figure 4j. GALNT14 protein expression after treatment with vehicle, 12.5 or 100 µg/mL arecoline for 24 h in HSC3.

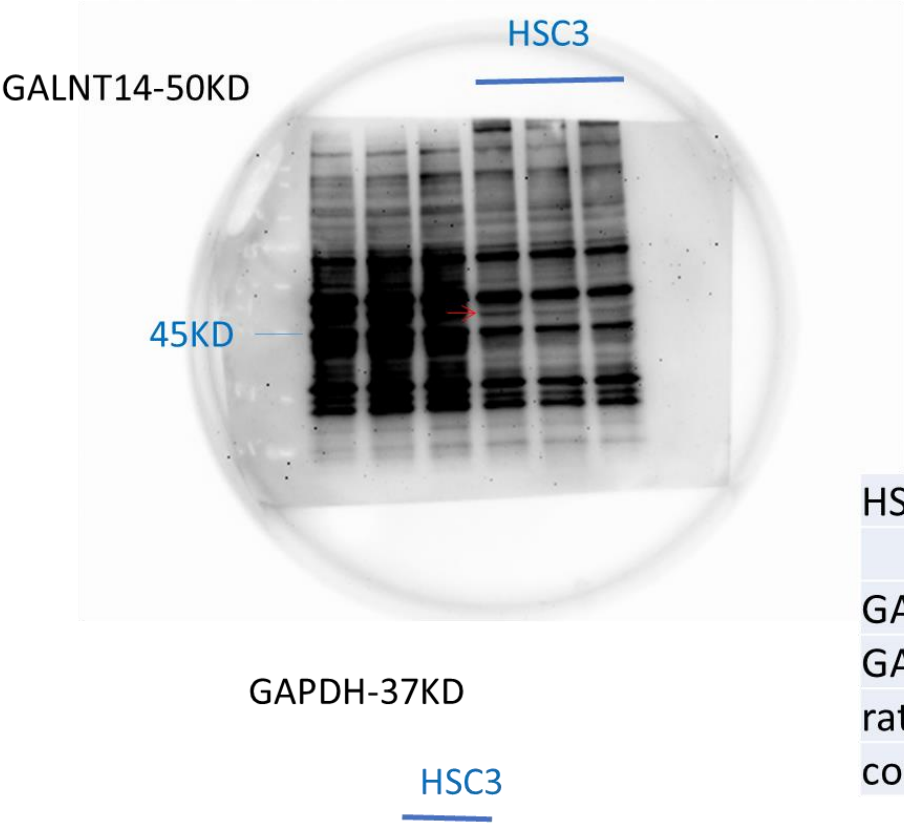

| HSC3       |             |             |             |
|------------|-------------|-------------|-------------|
|            | CON         | ARE 12.5    | ARE 100     |
| GALNT 14   | 51283.045   | 34344.238   | 30025.459   |
| GAPDH      | 44606.087   | 39955.329   | 39128.865   |
| ratio      | 1.149687149 | 0.859565892 | 0.767348069 |
| comparison | 1.00        | 0.75        | 0.67        |

Figure 4k. GALNT14 protein expression after treatment with vehicle, 12.5 or 100  $\mu\text{g/mL}$  arecoline for 24 h in OECM-1.

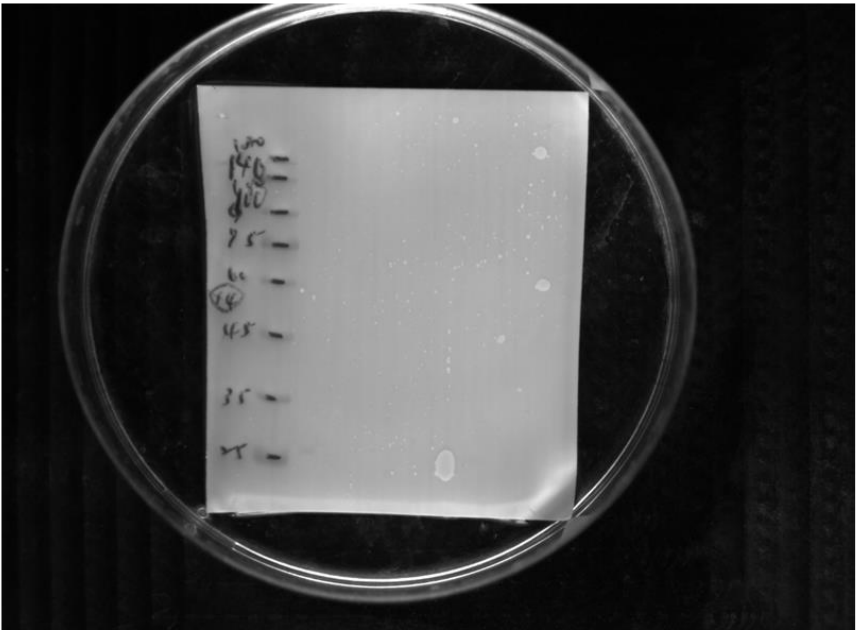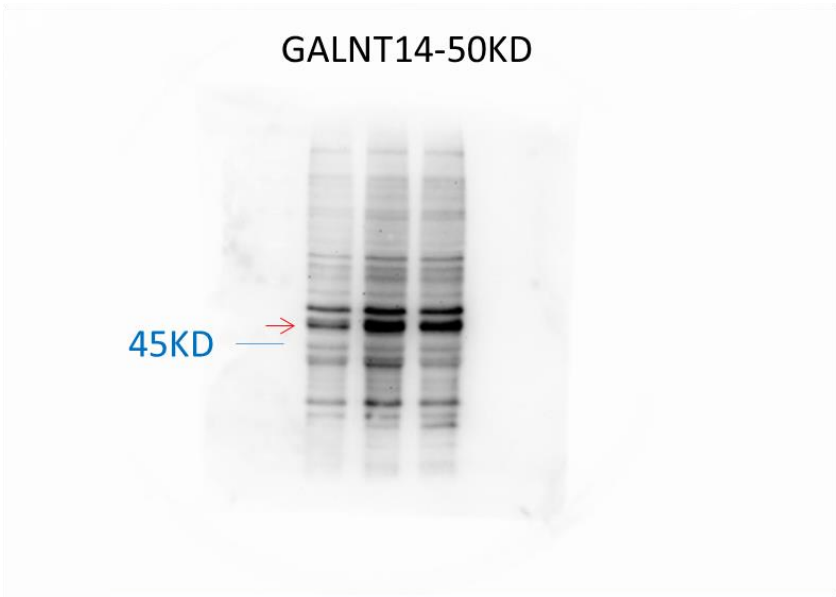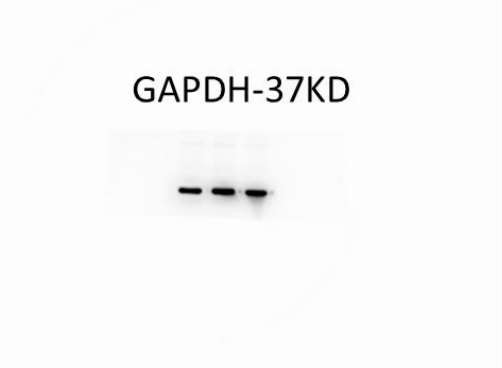

| OECM-1     |             |             |             |
|------------|-------------|-------------|-------------|
|            | CON         | ARE 12.5    | ARE 100     |
| GALNT 14   | 25937.116   | 53566.217   | 47624.338   |
| GAPDH      | 31793.388   | 43786.238   | 38974.409   |
| ratio      | 0.815802204 | 1.223357371 | 1.221938683 |
| comparison | 1.00        | 1.50        | 1.50        |

Figure 4I. GALNT14 protein expression after treatment with vehicle, 12.5 or 100 µg/mL arecoline for 24 h in A253.

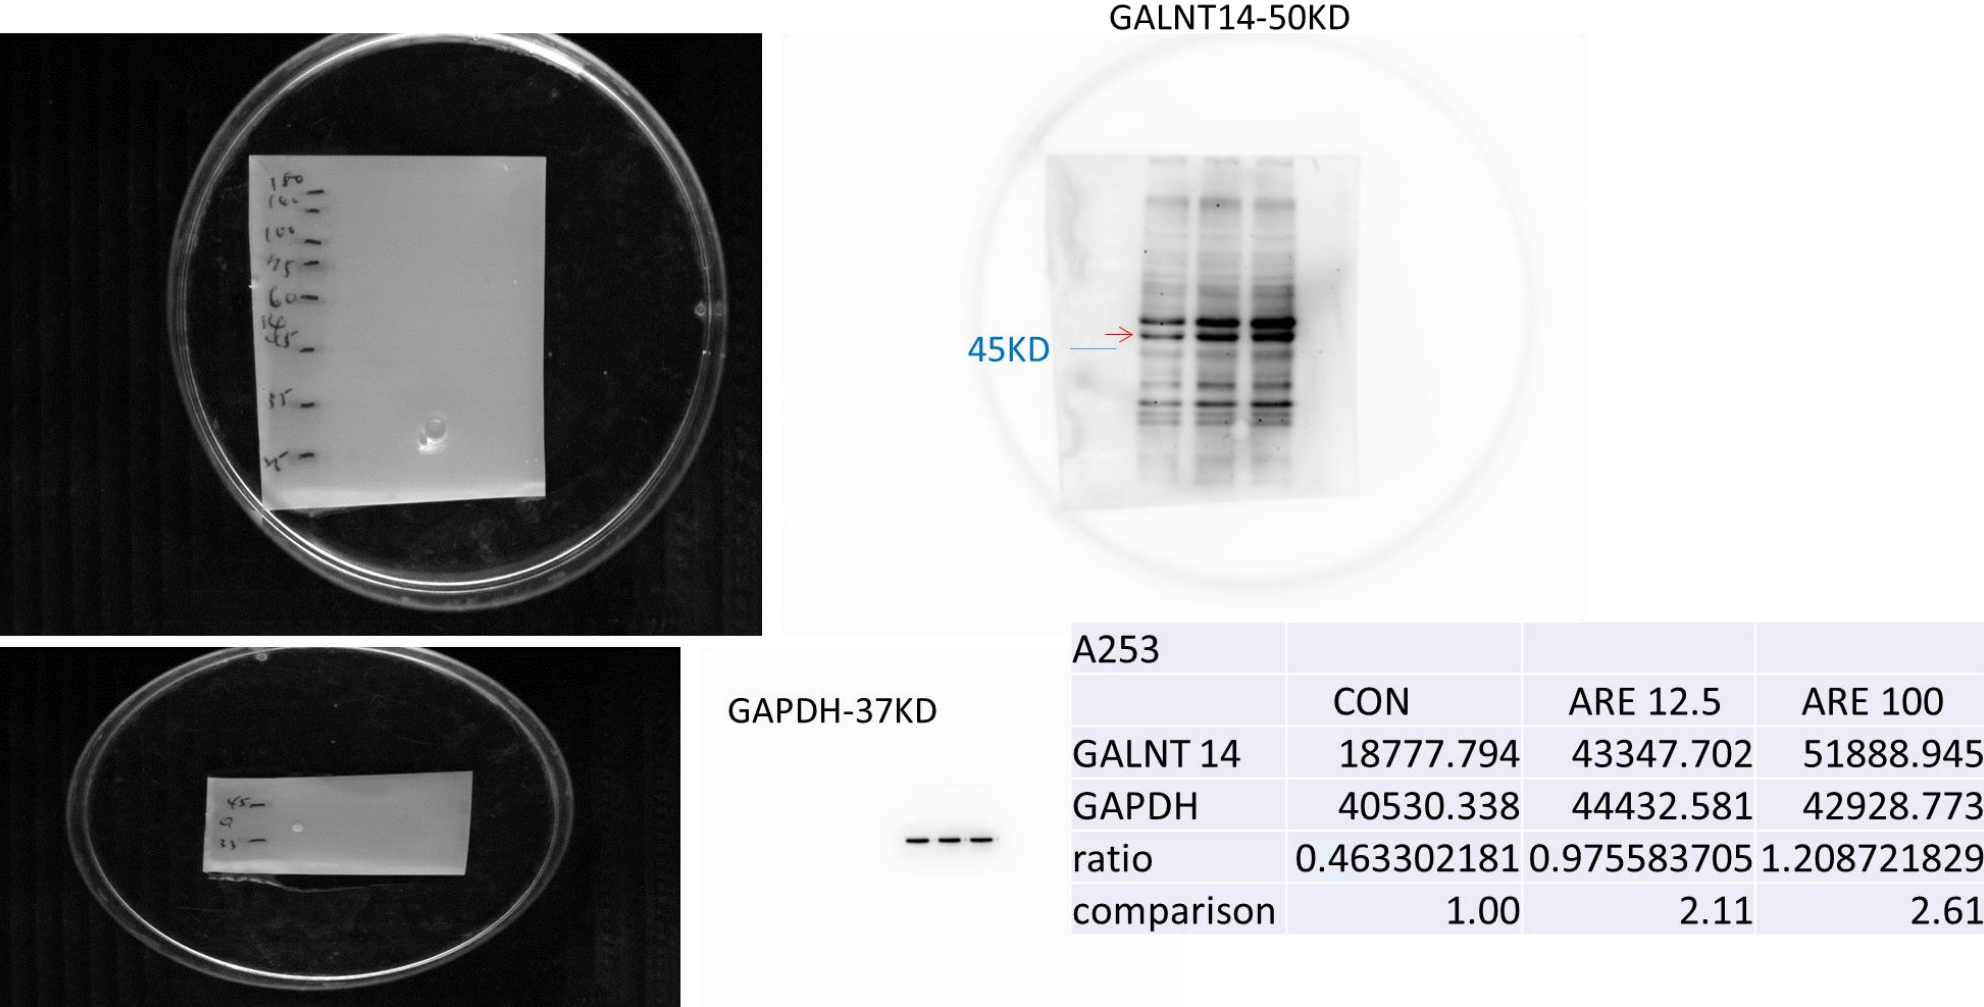



Figure 4m. GALNT14 protein expression after treatment with vehicle, 12.5 or 100 µg/mL arecoline for 24 h in FaDu.

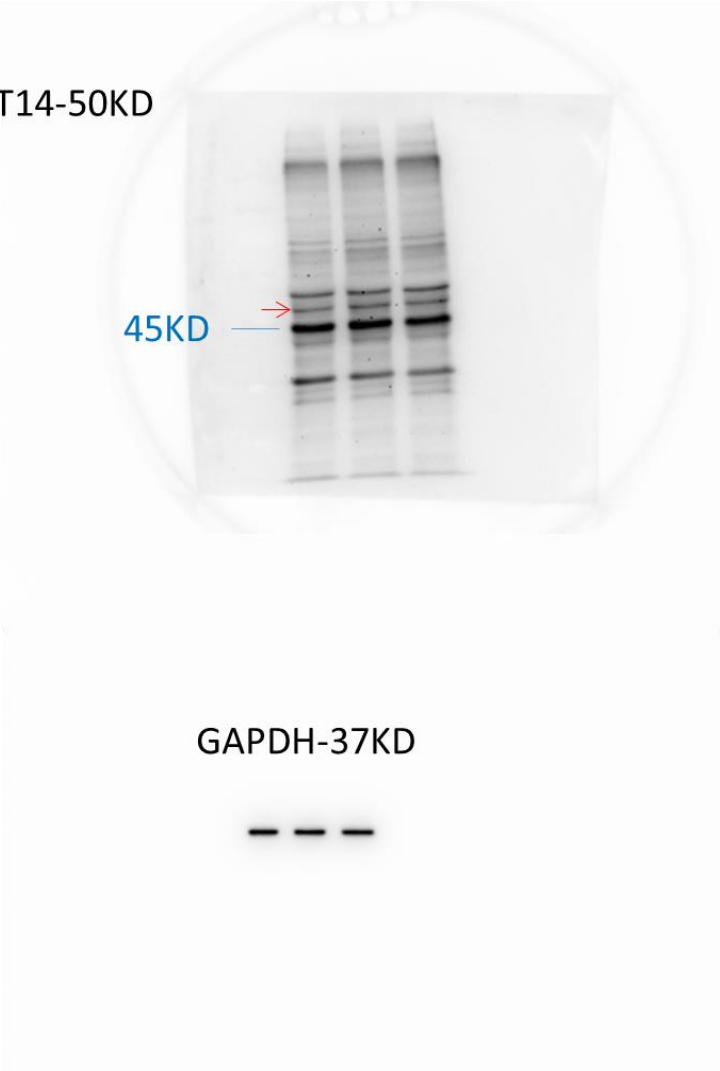

| FADU       |             |             |             |
|------------|-------------|-------------|-------------|
|            | CON         | ARE 12.5    | ARE 100     |
| GALNT 14   | 36059.681   | 46394.451   | 43711.167   |
| GAPDH      | 39124.459   | 43089.409   | 40708.167   |
| ratio      | 0.921665933 | 1.076701957 | 1.073768981 |
| comparison | 1.00        | 1.17        | 1.17        |

Figure 4n. GALNT14 protein expression after treatment with vehicle, 12.5 or 100 µg/mL arecoline for 24 h in SCC9.

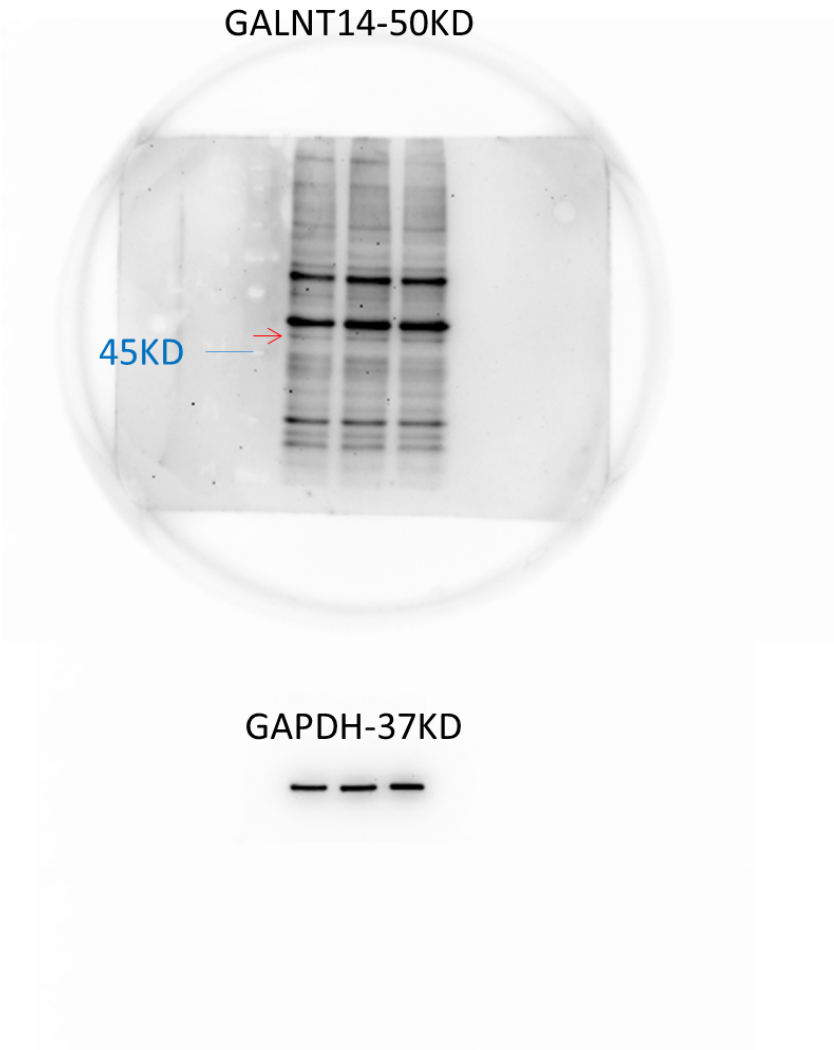

| SCC9       |             |             |             |
|------------|-------------|-------------|-------------|
|            | CON         | ARE 12.5    | ARE 100     |
| GALNT 14   | 24887.108   | 33044.229   | 43366.037   |
| GAPDH      | 38861.409   | 46550.095   | 46304.844   |
| ratio      | 0.640406734 | 0.709863836 | 0.936533487 |
| comparison | 1.00        | 1.11        | 1.46        |

Figure S1. All Western blot figures (uncropped blots) in Figure 4g-n, include densitometry readings/intensity ratio of each band.



Supplementary Figure S2.

GDC TCGA Head and Neck Cancer (HNSC), n=612

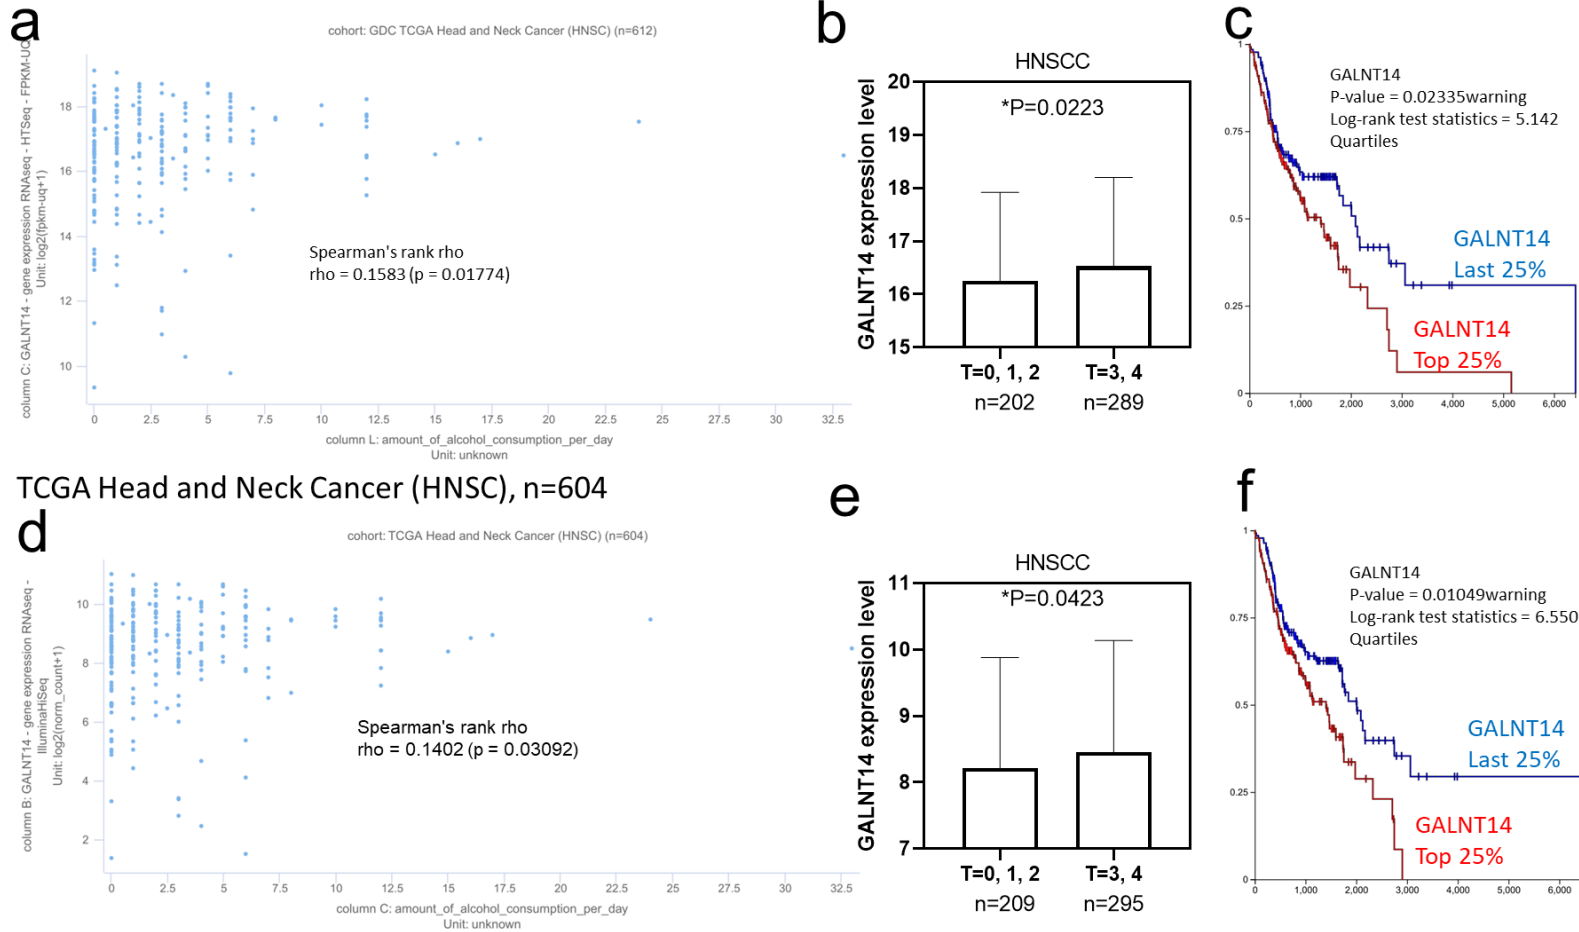

**Figure S2.** *GALNT14* expression level was associated with alcohol consumption, tumor stage, and survival time in head and neck cancer. (a, b, c) GDC TCGA Head and Neck Cancer profile. (d, e, f) TCGA Head and Neck Cancer profile. (a), (d) The relation between *GALNT14* expression level and alcohol consumption analyzed using Spearman's rank correlation test. (c), (e) *GALNT14* expression level in tumor early stage (0, 1, and 2) and late stage (3, and 4), analyzed using Mann-Whitney test. (c), (f) The survival time of *GALNT14* expression level last 25% and top 25% groups, Analyzed using Log-rank test. \* p < 0.05.

Supplementary Figure S3.

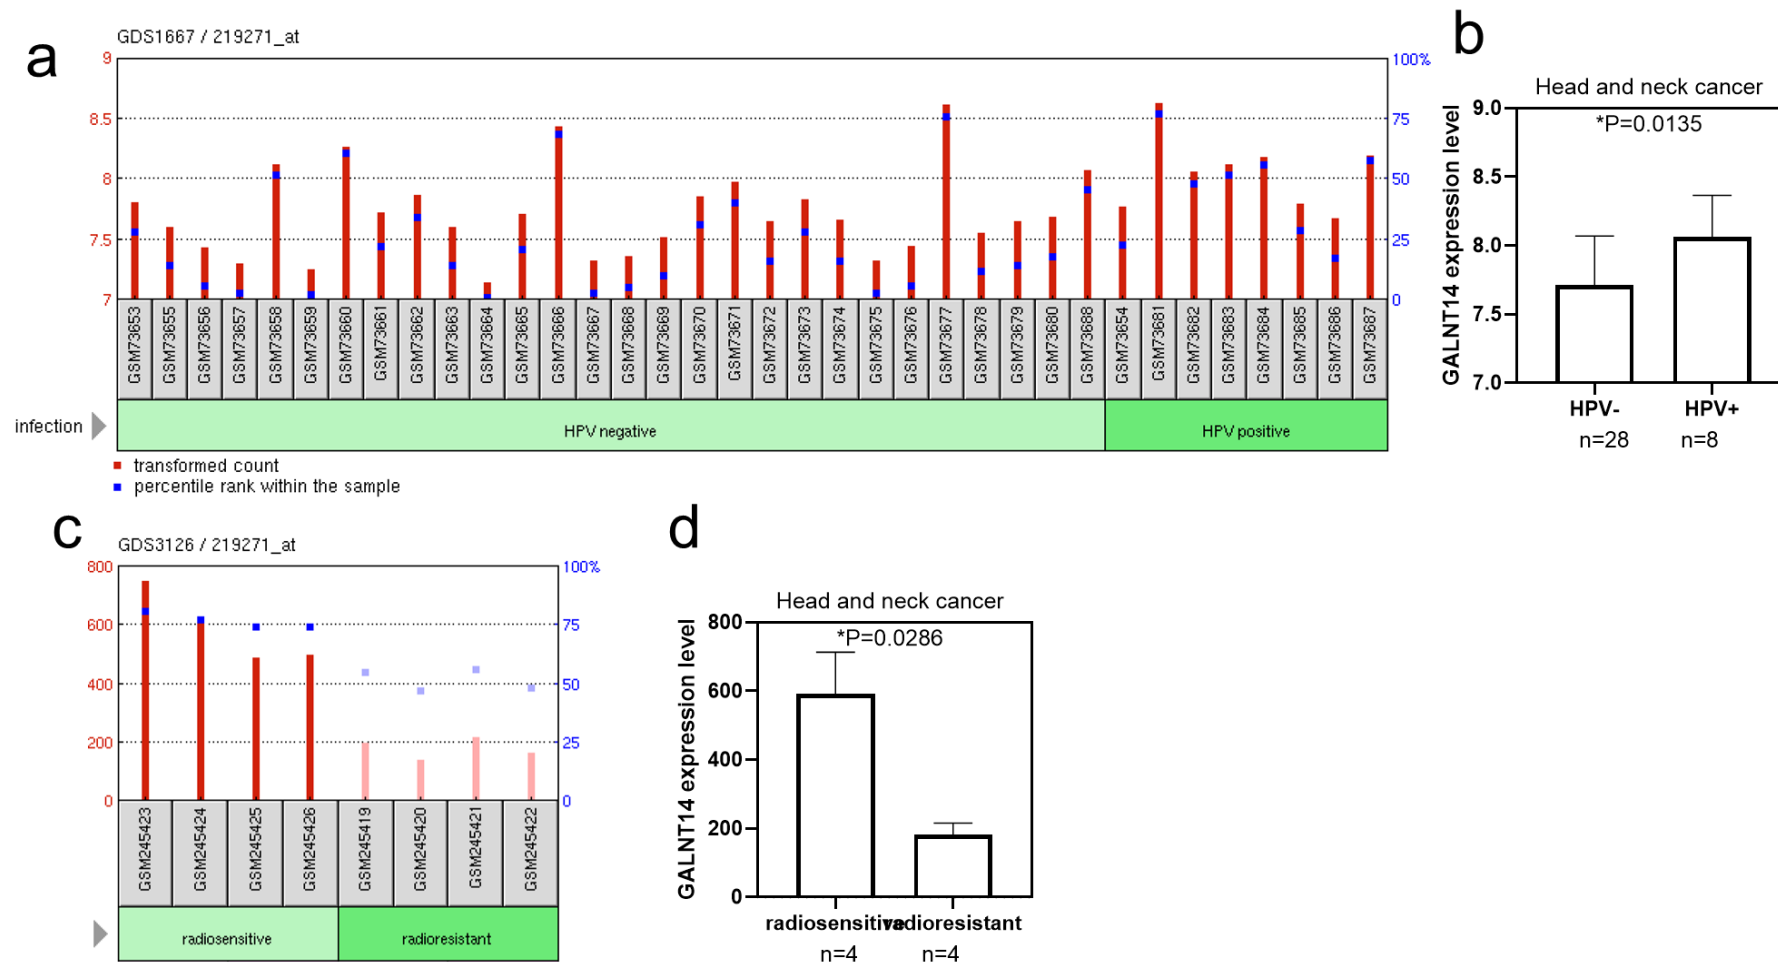

**Figure S3.** The relation between *GALNT14* expression and HPV positivity, or radiosensitivity in head and neck cancer. The data generated in this study are publicly available in GEO at GDS1667 / 219271\_at and GDS3126 / 219271\_at profiles. (a) The *GALNT14* expression level of each case in the GEO profile. HPV-, n=28; HPV+, n=8. (b) *GALNT14* expression level (mean  $\pm$  SD) in HPV- and HPV+ groups. (c) The *GALNT14* expression level of each case in the GEO profile. Radiosensitive, n=4; Radioresistant, n=4. (d) *GALNT14* expression level (mean  $\pm$  SD) in radiosensitive and radioresistant groups. (b), (d), analyzed using Mann-Whitney test. \*  $p < 0.05$ .
