# Supplementary material for: Association of rs9679162 Genetic Polymorphism and Aberrant Expression of Polypeptide N-Acetylgalactosaminyltransferase 14 (GALNT14) in Head and Neck Cancer
Source: MDPI journal article supplement (doi:10.3390/cancers14174217), 2022-08-30
Supplement: s1 [file s1]

## Supplementary Tables

**Table S1.** Clinical characteristics of the subjects in *GALNT14*-rs9679162 polymorphism analysis.

|                        | HNSCC (mean of age=57.33±10.50) |               |              |              |
|------------------------|---------------------------------|---------------|--------------|--------------|
|                        | OSCC                            | OPSCC         | LSCC         | others       |
| <b>Mean of age</b>     | 56.68 ± 10.67                   | 57.62 ± 7.358 | 58.76 ±10.90 | 58.30 ±16.98 |
| <b>Gender</b>          |                                 |               |              |              |
| male                   | 106 (93.8%)                     | 36 (92.3%)    | 37 (100.0%)  | 9 (90.0%)    |
| female                 | 7 (6.2%)                        | 3 (7.7%)      | 0 (0.0%)     | 1 (10.0%)    |
| <b>Alcohol</b>         |                                 |               |              |              |
| no                     | 30 (26.5%)                      | 6 (15.4%)     | 11 (29.7%)   | 4 (40.0%)    |
| yes                    | 83 (73.5%)                      | 33 (84.6%)    | 26 (70.3%)   | 6 (60.0%)    |
| <b>Betel nut</b>       |                                 |               |              |              |
| no                     | 23 (20.4%)                      | 8 (20.5%)     | 13 (35.1%)   | 7 (70.0%)    |
| yes                    | 90 (79.6%)                      | 31 (79.5%)    | 24 (64.9%)   | 3 (30.0%)    |
| <b>Cigarette</b>       |                                 |               |              |              |
| no                     | 15 (13.3%)                      | 2 (5.1%)      | 9 (24.3%)    | 3 (30.0%)    |
| yes                    | 98 (86.7%)                      | 37 (94.9%)    | 28 (75.7%)   | 7 (70.0%)    |
| <b>Differentiation</b> |                                 |               |              |              |
| no record              | 7 (6.2%)                        | 2 (5.1%)      | 3 (8.1%)     | 2 (20.0%)    |
| well                   | 15 (13.3%)                      | 1 (2.6%)      | 0 (0.0%)     | 0 (0.0%)     |
| moderate               | 86 (76.1%)                      | 30 (76.9%)    | 32 (86.5%)   | 8 (80.0%)    |
| poor                   | 5 (4.4%)                        | 6 (15.4%)     | 2 (5.4%)     | 0 (0.0%)     |
| <b>TNM</b>             |                                 |               |              |              |
| no record              | 11 (9.7%)                       | 3 (7.7%)      | 6 (16.2%)    | 2 (20.0%)    |
| T0                     | 2 (1.8%)                        | 1 (2.6%)      | 0 (0.0%)     | 0 (0.0%)     |
| T1                     | 20 (17.7%)                      | 3 (7.7%)      | 11 (29.7%)   | 6 (60.0%)    |
| T2                     | 22 (19.5%)                      | 18 (46.2%)    | 9 (24.3%)    | 0 (0.0%)     |
| T3                     | 19 (16.8%)                      | 6 (15.4%)     | 7 (18.9%)    | 1 (10.0%)    |
| T4                     | 39 (34.5%)                      | 8 20.5%       | 4 (10.8%)    | 1 (10.0%)    |
| <b>TNM</b>             |                                 |               |              |              |
| no record              | 14 (12.4%)                      | 4 (10.3%)     | 4 (10.8%)    | 2 (20.0%)    |
| N=0                    | 61 (54.0%)                      | 13 (33.3%)    | 10 (27.0%)   | 5 (50.0%)    |
| N=1                    | 9 (8.0%)                        | 6 (15.4%)     | 4 (10.8%)    | 0 (0.0%)     |
| N=2                    | 18 (16.0%)                      | 14 (35.9%)    | 16 (43.2%)   | 3 (30.0%)    |
| N=3                    | 11 (9.7%)                       | 2 (5.1%)      | 3 (8.1%)     | 0 (0.0%)     |
| <b>Stage</b>           |                                 |               |              |              |
| no record              | 5 (4.4%)                        | 0 (0.0%)      | 4 (10.8%)    | 1 (10.0%)    |
| stage BBB              | 8 (7.1%)                        | 3 (7.7%)      | 2 (5.4%)     | 1 (10.0%)    |
| stage I                | 16 (14.2%)                      | 5 (12.8%)     | 6 (16.2%)    | 3 (30.0%)    |
| stage II               | 12 (10.6%)                      | 4 (10.3%)     | 1 (2.7%)     | 0 (0.0%)     |
| stage III              | 18 (15.9%)                      | 6 (15.4%)     | 7 (18.9%)    | 1 (10.0%)    |
| stage IV               | 54 (47.8%)                      | 21 (53.8%)    | 17 (45.9%)   | 4 (40.0%)    |
| <b>Radiotherapy</b>    |                                 |               |              |              |
| no                     | 44 (40.0%)                      | 12 (30.8%)    | 10 (27.0%)   | 5 (50.0%)    |
| yes                    | 69 (60.0%)                      | 27 (69.2%)    | 27 (73.0%)   | 5 (50.0%)    |
| <b>Chemotherapy</b>    |                                 |               |              |              |

|                        |            |            |            |           |
|------------------------|------------|------------|------------|-----------|
| no                     | 40 (35.4%) | 6 (15.4%)  | 11 (29.7%) | 4 (40.0%) |
| yes                    | 73 (64.6%) | 33 (84.6%) | 26 (70.3%) | 6 (60.0%) |
| <b>Survival status</b> |            |            |            |           |
| live                   | 81 (71.7%) | 17 (43.6%) | 16 (43.2%) | 4 (40.0%) |
| dead                   | 32 (28.3%) | 22 (56.4%) | 21 (56.8%) | 6 (60.0%) |
| <b>Primary site</b>    |            |            |            |           |
| tongue                 | 32 (28.3%) | --         | --         | --        |
| cheek                  | 34 (30.0%) | --         | --         | --        |
| others                 | 47 (41.6%) | --         | --         | --        |

**Table S2.** Clinical characteristics of the subjects in *GALNT14* mRNA expression analysis.

|                                      | HNSCC       |             |            |        |
|--------------------------------------|-------------|-------------|------------|--------|
|                                      | OSCC        | OPSCC       | LSCC       | others |
| <b>Mean of age</b>                   | 56.67±11.72 | 58.65±8.054 | 58.8±12.08 | 55     |
| <b>Gender</b>                        |             |             |            |        |
| male                                 | 26          | 18          | 20         | 1      |
| female                               | 1           | 2           | 0          | 0      |
| <b>Alcohol</b>                       |             |             |            |        |
| no                                   | 13          | 4           | 6          | 0      |
| yes                                  | 14          | 16          | 14         | 1      |
| <b>Betel nut</b>                     |             |             |            |        |
| no                                   | 12          | 4           | 9          | 0      |
| yes                                  | 15          | 16          | 11         | 1      |
| <b>Cigarette</b>                     |             |             |            |        |
| no                                   | 8           | 2           | 4          | 0      |
| yes                                  | 19          | 18          | 16         | 1      |
| <b>Differentiation</b>               |             |             |            |        |
| no record                            | 3           | 0           | 1          | 0      |
| well                                 | 6           | 1           | 0          | 0      |
| moderate                             | 18          | 15          | 19         | 1      |
| poor                                 | 0           | 4           | 0          | 0      |
| <b>TNM</b>                           |             |             |            |        |
| no record                            | 6           | 1           | 6          | 0      |
| T0                                   | 0           | 0           | 0          | 0      |
| T1                                   | 4           | 2           | 9          | 0      |
| T2                                   | 5           | 11          | 4          | 0      |
| T3                                   | 1           | 2           | 0          | 0      |
| T4                                   | 11          | 4           | 1          | 1      |
| <b>TNM</b>                           |             |             |            |        |
| no record                            | 7           | 2           | 5          | 0      |
| n=0                                  | 9           | 9           | 5          | 1      |
| N=1                                  | 3           | 1           | 0          | 0      |
| N=2                                  | 8           | 8           | 10         | 0      |
| N=3                                  | 0           | 0           | 0          | 0      |
| <b>Stage</b>                         |             |             |            |        |
| no record                            | 5           |             | 4          | 0      |
| stage BBB                            | 1           | 1           | 2          | 0      |
| stage I                              | 3           | 2           | 7          | 0      |
| stage II                             | 2           | 3           | 0          | 0      |
| stage III                            | 3           | 3           | 0          | 0      |
| stage IV                             | 13          | 11          | 7          | 1      |
| <b>Radiotherapy- survival status</b> |             |             |            |        |
| no                                   | 9           | 7           | 9          | 0      |
| yes                                  | 18          | 13          | 11         | 1      |
| <b>Chemotherapy- survival status</b> |             |             |            |        |
| no                                   | 9           | 3           | 12         | 0      |
| yes                                  | 18          | 17          | 8          | 1      |
| <b>Survival status</b>               |             |             |            |        |
| live                                 | 12          | 7           | 8          | 0      |
| dead                                 | 15          | 13          | 12         | 1      |

|                     |    |    |    |    |    |
|---------------------|----|----|----|----|----|
| <b>Primary site</b> |    |    |    |    |    |
| tongue              | 4  | -- | -- | -- | -- |
| cheek               | 8  | -- | -- | -- | -- |
| others              | 15 | -- | -- | -- | -- |
